# Supplementary material
Source: MDPI journal article supplement (https://www.mdpi.com/2504-477X/7/5/185)
Supplement: s1 [file s1]

## Supplementary Materials

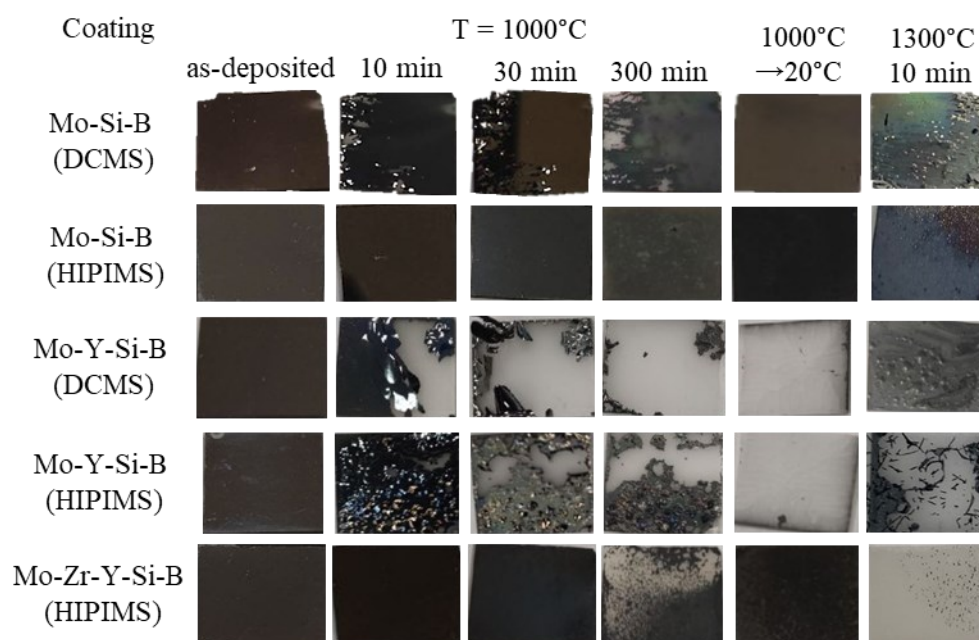

**Figure S1.** Appearance of the coatings after annealing at a temperature of 1000 °C and exposures of 10–300 min, and after annealing at 1000 °C followed by cooling to 20 °C and high-temperature annealing at 1300 °C.
